1     **The influence of heteroresistance on minimum inhibitory concentration (MIC),**  
2                     **investigated using weak-acid stress in food spoilage yeasts**

3

4             Joseph Violet<sup>1</sup>, Joost Smid<sup>2</sup>, Annemarie Pielaat<sup>2</sup>, Jan-Willem Sanders<sup>2</sup> and Simon V. Avery<sup>1,\*</sup>

5

6                             <sup>1</sup>School of Life Sciences, University of Nottingham,

7                                     Nottingham NG7 2RD, United Kingdom

8

9                                     <sup>2</sup>Unilever Foods Innovation Centre,

10                                     Bronland 14, 6708 WH Wageningen, the Netherlands

11

12

13

14     **Running title:** Heteroresistance of spoilage yeasts to sorbic acid

15

16

17     **Key words:** cell individuality, inoculum effect, weak acid preservatives, food security, food spoilage,

18     phenotypic heterogeneity

19

20

21

22

23

24     **\*Corresponding author:** Simon.Avery@nottingham.ac.uk

## 25 Abstract

26 Populations of microbial cells may resist environmental stress by maintaining a high population-  
27 median resistance ( $IC_{50}$ ) or, potentially, a high variability in resistance between individual cells  
28 (heteroresistance); where heteroresistance would allow certain cells to resist high stress, provided  
29 the population was sufficiently large to include resistant cells. This study sets out to test the  
30 hypothesis that both  $IC_{50}$  and heteroresistance may contribute to conventional minimal-inhibitory-  
31 concentration (MIC) determinations, using the example of spoilage-yeast resistance to the  
32 preservative sorbic acid. Across a panel of 26 diverse yeast species, both heteroresistance and  
33 particularly  $IC_{50}$  were positively correlated with predicted MIC. A focused panel of 29 different  
34 isolates of a particular spoilage yeast was also examined (isolates previously recorded as  
35 *Zygosaccharomyces bailii*, but genome resequencing revealing that several were in fact hybrid  
36 species, *Z. parabailii* and *Z. pseudobailii*). Applying a novel high-throughput assay for  
37 heteroresistance, it was found that  $IC_{50}$  but not heteroresistance was positively correlated with  
38 predicted MIC when considered across all isolates of this panel, but the heteroresistance-MIC  
39 interaction differed for the individual *Zygosaccharomyces* subspecies. *Z. pseudobailii* exhibited  
40 higher heteroresistance than *Z. parabailii* whereas the reverse was true for  $IC_{50}$ , suggesting possible  
41 alternative strategies for achieving high MIC between subspecies. This work highlights the limitations  
42 of conventional MIC measurements due to the effect of heteroresistance in certain organisms, as  
43 the measured resistance can vary markedly with population (inoculum) size.

44

## 45 Importance

46 Food spoilage by fungi is a leading cause of food waste, with specialised food spoilage yeasts capable  
47 of growth at preservative concentrations above the legal limit, in part due to heteroresistance  
48 allowing small subpopulations of cells to exhibit extreme preservative resistance. Whereas

49 heteroresistance has been characterised in numerous ecological contexts, measuring this phenotype  
50 systematically and assessing its importance are not encompassed by conventional assay methods.  
51 The development here of a high-throughput method for measuring heteroresistance, amenable to  
52 automation, addresses this issue and has enabled characterisation of the contribution that  
53 heteroresistance may make to conventional MIC measurements. We used the example of sorbic acid  
54 heteroresistance in spoilage yeasts like *Zygosaccharomyces* spp, but the approach is relevant to  
55 other fungi and other inhibitors, including antifungals. The work shows how median resistance,  
56 heteroresistance and inoculum size should all be considered when selecting appropriate inhibitor  
57 doses in real-world antimicrobial applications such as food preservation.

58

## 59 Introduction

60 Resistance of microorganisms to inhibitory agents is a growing problem in therapeutics (Andersson  
61 et al., 2019, Dewachter et al., 2019) and food supply chains (Davies et al. 2020). The resistance of a  
62 microorganism to a stressor is typically described using a conventional minimum inhibitory  
63 concentration (MIC) measurement, which reflects the concentration of a stressor required to  
64 prevent growth at a particular fixed inoculum size (Box 1). Other measures of stress resistance  
65 include  $IC_{50}$ , a population-median measure describing the concentration required to inhibit either  
66 50% of cells in a population (as used in the present work, Box 1) or all cells by 50%, depending on the  
67 study. In recent years there has been growing recognition also of heteroresistance, describing the  
68 heterogeneity of resistance between individual clonal cells (Box 1), which appears to be very  
69 ubiquitous (Bishop et al. 2007, Holland et al. 2014, Jing et al. 2018, Levy et al., 2012). However, the  
70 extent to which differences in heteroresistance may contribute to MIC of a cell inoculum remains  
71 barely explored, especially relative to traditional measures such as  $IC_{50}$ . The present work aimed to  
72 address this gap in our knowledge, as it could explain variability in MIC data that are used as  
73 common standards, due to parameters such as population size and the inoculum effect (Box 1).

### Box 1: Definitions of parameters

- 1) **MIC**: minimum inhibitory concentration, i.e., lowest concentration of a stressor required to completely inhibit the growth of an inoculum of a microorganism.
- 2) **MIC<sup>EXP</sup>**: Experimentally derived MIC, at a given inoculum size, e.g., the MIC<sup>EXP</sup> for 100 cells of a given strain could be different to the MIC<sup>EXP</sup> for 10,000 cells of the same strain.
- 3) **MIC<sup>MODEL</sup>**: MIC of 10,000 cells/well predicted using a lognormal distribution curve, fitted to MIC<sup>EXP</sup> values (see *Fitting to normal and lognormal distributions*)
- 4) **Heteroresistance**: Cell-cell phenotypic heterogeneity in a resistance phenotype. Here quantified as the standard deviation of a lognormal distribution of single cell resistances
- 5) **IC<sub>50</sub>**: Population-median resistance, here defined as the mean of a lognormal distribution of single cell resistances
- 6) **Inoculum effect**: Phenomenon by which MIC<sup>EXP</sup> increases with inoculum size, due to increased probability of resistant cells being present

74

75 Phenotypic heterogeneity among individual cells of genetically uniform populations is considered an  
76 evolutionarily selected strategy akin to bet hedging (Ackermann 2015). It describes cell-to-cell  
77 variation in a phenotype (e.g. stress resistance) within a cell population, resulting in phenotypically  
78 (not genotypically-) distinct subpopulations among which some may be better equipped to thrive if  
79 conditions change (Ackermann 2015, Smith et al., 2007, Levy et al. 2012, Stratford et al 2019). The  
80 rationale is that generation of phenotypic heterogeneity, may be a relatively low cost strategy  
81 (metabolically) for improving survival-chances in uncertain conditions. Such heterogeneity in the  
82 case of stress resistance can be observed in almost any resistance phenotype: examples of  
83 heteroresistance are evident in microbial responses to antibiotics (Dewachter et al., 2019, Scheler et  
84 al., 2020, Jing et al. 2018), heat (Levy et al., 2012), osmotic (Stratford et al. 2019), metal (Holland et  
85 al., 2014) and weak organic acid (Stratford et al. 2014, Geoghegan et al. 2020) stresses. Mechanistic  
86 determinants of heteroresistance have been characterised, including cell-to-cell variation in gene  
87 expression linked to particular ‘high’ or ‘low’-variation promoters or transcription factors, commonly  
88 referred to as gene expression noise (Silander et al. 2011, Urchueguia et al., 2021, Newman et al.  
89 2006). Housekeeping genes tend to be expressed with low variation between cells, whereas high-  
90 variation promoters are more commonly associated with stress-response genes (Newman et al.  
91 2006). Engineering increased variation of expression of an oxidative stress response gene has been  
92 shown to increase resistance to oxidative stress in *Saccharomyces cerevisiae* (Liu et al., 2018), while  
93 dampening of expression variation in similar functions gave decreased resistance (Smith et al.,  
94 2007).

95 As food spoilage microorganisms can exhibit both high population-median resistance and  
96 heteroresistance to food preservatives (Stratford et al. 2014), they provide a good example with  
97 which to address this study’s main aim to characterise the relationship between MIC and  
98 heteroresistance versus population-median resistance. Among the major food preservatives, sorbic  
99 acid is a weak organic acid preservative widely used in condiments and drinks of  $\text{pH} \leq 4$ , conditions in  
100 which the acid is undissociated and capable of traversing the plasma membrane. Several modes of

101 action have been proposed for sorbic acid, including cytosolic acidification (Stratford et al., 2013a)  
102 and disruption of the mitochondrial electron transport chain (Stratford et al., 2020). Efficacy of  
103 sorbic acid as a food preservative is hampered by the intrinsic resistance of specialised spoilage  
104 yeasts, which are capable of growth at sorbic concentrations exceeding the maximum legal limit  
105 dictated by food standards agencies (Stratford et al., 2013b).

106 *Zygosaccharomyces bailii* is a food spoilage yeast exhibiting a high level of resistance to weak organic  
107 acids (Stratford et al. 2014). Two interspecies hybrids related to *Z. bailii* and also reported to spoil  
108 preserved foods are *Z. parabailii* and *Z. pseudobailii*, formed through hybridisation events between  
109 ancestral *Z. bailii* and two unknown *Zygosaccharomyces* species, sharing approximately 90-93%  
110 sequence identity with *Z. bailii* (Braun-Galleani et al., 2018). *Z. bailii* has several proposed  
111 mechanisms of resistance to weak organic acids, including a relatively thick and rigid plasma  
112 membrane (Lindberg et al. 2013, Lindahl et al. 2016), metabolism of sorbic acid to less inhibitory  
113 products (Mollapour and Piper, 2001), metabolism that is primarily fermentative (Stratford et al.  
114 2020) and a low cytosolic pH (Stratford et al. 2013b, 2014). In addition to being relatively resistant to  
115 sorbic acid (according to MIC or IC<sub>50</sub>), *Z. bailii* also shows high sorbic acid heteroresistance (Stratford  
116 et al. 2013b), with a small proportion of cells capable of resisting extreme concentrations even  
117 though they may take several weeks to grow to detectable levels.

118 The food-industry relevance of *Z. bailii*, coupled with its high heteroresistance makes it an ideal  
119 model for studying the relative contributions of population-median resistance and heteroresistance  
120 to MIC. In this study we assess and compare these parameters in a panel of diverse spoilage yeasts  
121 as well as more select panels of *Z. bailii*, *Z. parabailii* and *Z. pseudobailii* isolates. The work highlights  
122 the importance of context when assessing the resistance of a microorganism, with population-  
123 median resistance, heteroresistance and inoculum size impacting the resistance of a given inoculum,  
124 nuances which are lost when an MIC at a single inoculum size is taken.

125

## 126 Materials and Methods

### 127 Yeast species and strains

128 Yeast species and strains used for experiments in this study are listed in Tables 1, 2 (alternative  
129 identifiers and origin of isolation are given where available). Members of a large, initial  
130 *Zygosaccharomyces* panel (Table S1) were designated *Z. bailii*, *Z. parabailii* or *Z. parabailii* based on  
131 whole genome sequencing (WGS) analysis (see Genome sequencing) and a subset of these  
132 comprised the main *Zygosaccharomyces* panel used for experiments (Table 1). Several species  
133 previously designated *Z. bailii* were redesignated *Z. parabailii* or *Z. pseudobailii* based on the WGS  
134 analysis (below). Members of a wide panel of isolates from more diverse yeast genera (Table S2)  
135 were identified previously based on sequencing of the D1/D2 region of the 25S ribosomal DNA  
136 (rDNA) (Stratford et al. 2013b).

### 137 Culture conditions

138 The YEPD growth medium used for culturing [20 g/l glucose, 20 g/l bacteriological peptone (Oxoid),  
139 and 10 g/l yeast extract (Oxoid)] was adjusted to pH 4 using 5 M HCl prior to sterilisation by  
140 autoclaving. Yeasts were stored at  $-80^{\circ}\text{C}$  in cryovials in YEPD medium mixed with 0.2 volumes  
141 glycerol. Cells were grown from frozen on YEPD supplemented with 2% agar (Oxoid) for 3 days at  
142  $30^{\circ}\text{C}$ , before maintenance at  $4^{\circ}\text{C}$  for up to 3 weeks. For each biological replicate in experiments, a  
143 single colony was suspended in 1 ml YEPD broth and, after determination of  $\text{OD}_{600}$ , an aliquot  
144 transferred to 10 ml YEPD broth in order to give a starting  $\text{OD}_{600}\sim 0.02$ . These cultures were  
145 incubated in 50 ml Erlenmeyer flasks at  $24^{\circ}\text{C}$  for  $>12$  hours with shaking (120 rev/min) prior to use in  
146 experiments at  $\text{OD}_{600}$  0.1 – 2.0, when cells were growing in exponential phase. Desired  
147 concentrations of sorbic acid in the growth medium were produced using a stock solution of 20 mM  
148 potassium sorbate (Sigma-Aldrich) in YEPD, adjusted to pH 4 using 5 M HCl. Final concentrations of  
149 sorbic acid in YEPD agar or broth were produced by mixing appropriate ratios of YEPD medium (pH

150 4) with the 20 mM sorbic acid-supplemented medium. All steps were carried out under aseptic  
151 conditions.

#### 152 De novo genome sequencing

153 *De novo* genome sequencing was carried out by KeyGene (Wageningen, Netherlands) by mapping  
154 short Illumina reads to long PacBio reads for *Z. bailii* (7846), *Z. parabailii* (3699, containing *Z. bailii*-  
155 derived 'A' genome and hybrid 'B' genome) and *Z. pseudobailii* (3697, containing *Z. bailii*-derived 'A'  
156 genome and hybrid 'C' genome). Yeast isolates were grown in YEPD medium at 25°C for 48 hours.  
157 Subsequently, cells were harvested by centrifugation (3000 *g*, 3 min), the supernatant removed and  
158 the pelleted cultures freeze dried prior to DNA isolation. Isolation of high molecular weight DNA  
159 suitable for long-read sequencing was carried out by Keygene based on methods described  
160 previously (Zhang et al. 2012, Datema et al. 2016).

161 To generate the sequencing data for *Z. pseudobailii* and *Z. parabailii*, one PacBio SMRT cell (Sequel)  
162 was used for each isolate. The same DNA was used for generating paired-end Illumina reads (MiSeq)  
163 that was used for polishing of the PacBio data. To obtain the initial assembly of the two hybrid  
164 species, *Z. parabailii* and *Z. pseudobailii*, the falcon-based HGAP 4 assembly method in SMRT Link  
165 portal v7.0 from Pacific Biosciences was used. As the method already includes the error correction of  
166 long reads, polishing was continued with Illumina short reads which has lower base calling error. The  
167 assembly was polished three times using Pilon software version 1.22. The inverted full size contigs in  
168 the assembly with respect to the reference genome were reverse complemented to make the  
169 assembly compatible with public reference. The contigs which were partially inverted were left as  
170 they were.

171 For the assembly of the *Z. bailii* genome, the sequencing library was prepared from PacBio high  
172 fidelity (HiFi) reads, with lower error rate (similar to Illumina short reads), hence no polishing was  
173 required. HiFi reads were obtained via circular consensus sequencing (CSS) from the SMRT Link  
174 portal. The reads were then assembled into the draft assembly using the HiFi option of the Canu



175 assembler. The draft assembly was polished twice with HiFi reads using Racon software. Then, the  
176 repetitive haplotypes were cleaned using the Purge Haplotigs pipeline. The remaining contigs were  
177 checked for contamination by aligning the assembly to public reference, and by aligning a part of the  
178 contigs to the BLASTn database. Finally, for all final assemblies of the three *Zygosaccharomyces*  
179 subspecies, a BUSCO analysis was performed to check the completeness of genomes. The pairwise  
180 alignments of genomes were done via the nucmer algorithm from the Mummer 4 package and  
181 KeyGene's proprietary STL aligner (multi genome aligner). The multiple genome alignments (as pan  
182 genomes) were visualized using Mauve software. All sequences used in this study were submitted to  
183 the ENA under the study code PRJEB59101; *de novo* sequences were assigned the accession  
184 numbers GCA\_949129065, GCA\_949129075 and GCA\_949129085 for *Z. parabailii* (3699), *Z. bailii*  
185 (7846) and *Z. pseudobailii* (3697), respectively.

#### 186 Genome sequencing of the initial panel of *Zygosaccharomyces* isolates

187 The 111 isolates from the initial panel (Table S1) were cultured for 24 hours at 25°C in YEPD and  
188 genomic DNA (gDNA) was isolated using the CTAB method (Stirling et al. 2003). Some gDNA samples  
189 contained evidence of bacterial DNA, therefore, not all strains were included in the library  
190 preparation and resequencing. Resequencing was performed by Illumina HiSeq4000 with 2x 125 bp,  
191 on two lanes. For all Illumina sequencing, quality control was based on the QC30 threshold (80% of  
192 reads with  $\leq 0.1\%$  chance of miscalled base in all lanes of each run). The raw sequence data were  
193 trimmed on a minimum base quality of 30 (Phred scores) and sequences with one or more N-  
194 nucleotides were discarded. After trimming and filtering, read pairs for which both pairs had a  
195 minimum read length of 50 nt were kept for further analysis. The pre-processed sequencing data  
196 was mapped to the reference genome using BWA mem 0.7.17. Duplicated reads in the BAM file  
197 were marked by Picard-tools MarkDuplicates (v1.63). SAMTOOLS (v1.3) was used to view, index, sort  
198 and to merge the alignment files and the BAM files per sample genotyped using GATK 4. Variants  
199 such as SNPs and INDELS were identified using GATK4 Haplotypecaller and were stored in a single

200 Variant Call Format (\*.vcf) file. These variants were filtered on allele quality, sample quality and  
201 allele depth. A minimum allele quality of 30, minimum sample quality of 20 and minimum allele  
202 coverage depth of 7X were used for filtering. SNPs found in all samples that are identical were  
203 discarded as they reflect errors in the reference sequence. The filtered variants were annotated  
204 using the gene models with SNPeff. Most genes in *Z. parabailii* (3699) and *Z. pseudobailii* (3697)  
205 were assigned to the A-subgenome (highly similar to the *Z. bailii* 7846 genome) or to the other  
206 subgenome (i.e. B or C; see below). The long sequence aligner Blasr v1.3 was used in the  
207 Bidirectional best hit approach to identify homologs. Only coding sequences were used for this  
208 approach, extracted from the annotated gene models. Homologous genes with a high sequence  
209 similarity (i.e. above 98%) to *Z. bailii* genes were assigned to the A-subgenome and genes below the  
210 sequence similarity threshold were assigned to the B-subgenome (hybrid genome of *Z. parabailii*) or  
211 C subgenome (hybrid genome of *Z. pseudobailii*). Phylogenetic trees were constructed based on  
212 Genetic Distance Analysis of all open reading frames of sequences assigned to the A genome. The A  
213 genome of each sequence was compared to the A genome of *Z. parabailii* reference strain 3699 and  
214 an Unweighted pair group method with the given arithmetic mean (UPGMA) score (Khan et al.,  
215 2008) assigned, from which a phylogenetic tree was constructed (Figure S5). All sequences used in  
216 this study were submitted to the ENA under the study code PRJEB59101; strain-specific sample  
217 numbers are quoted in Table S1.

#### 218 Dose-response curve assay for heteroresistance

219 Yeasts were grown to exponential phase as described above and diluted in YEPD broth to  $OD_{600}$   
220  $\sim 0.02$  (inoculum size in 75  $\mu$ l  $\sim 10,000$  cells) or  $OD_{600}$  0.0002 (inoculum size in 75  $\mu$ l  $\sim 100$  cells). The  
221 use of the different inocula allowed reliable determination of % viability across a wider range of  
222 sorbic acid concentrations. Aliquots (75  $\mu$ l) of each inoculum size were spread across 90 mm  
223 diameter Petri dishes containing 20 ml YEPD agar supplemented with different concentrations of  
224 sorbic acid (see above). After 21 days static incubation at 23°C, colony forming units (CFU) were

225 enumerated and percentage survival calculated by reference to control CFU counts on agar without  
226 sorbic acid. At least three biological replicates were used in each experiment (exact numbers are  
227 clarified in figure legends). Each of the biological replicates (from independent experiments) were  
228 the average of three technical replicates for each sorbic acid concentration. Percentage survival data  
229 was then fitted to a lognormal distribution curve in R software as detailed below (Fitting to normal  
230 and lognormal distributions). Values derived with the curve fitting for  $IC_{50}$ , heteroresistance and  
231 concentration at which 0.01% survival would be observed ( $MIC^{MODEL}$ ) were recorded.

### 232 Inoculum-effect assay for heteroresistance

233 The inoculum effect (Steels et al. 2000) (Box 1) explains how experimentally measured MIC ( $MIC^{EXP}$ )  
234 can increase with size of the cell inoculum, as increased cell number increases the chance that the  
235 inoculum includes phenotypically-variant cells that are hyper-resistant. Accordingly, the degree to  
236 which the inoculum effect alters  $MIC^{EXP}$  is related to the extent of heteroresistance:  $MIC^{EXP}$  would  
237 not be affected by inoculum size in a completely homogeneous cell population, whereas an impact  
238 of increasing inoculum size on  $MIC^{EXP}$  will be greater the broader the range of single-cell resistances  
239 (Figure 1A). It was reasoned that the magnitude of the inoculum effect could offer a novel,  
240 convenient measure of heteroresistance. Dose-response curves of growth-inhibitory effect typically  
241 follow a sigmoidal relationship (Stratford et al. 2013b) and have previously been modelled using Hill  
242 functions, (Geoghegan et al. 2020, Stratford et al., 2019), indicating a normal frequency distribution  
243 of single cell resistances. With that assumption, a relatively small number of  $MIC^{EXP}$  determinations  
244 at defined inoculum sizes becomes sufficient for curve-fitting (Figure 1B, top panel), to enable  
245 determination of standard deviation ( $\sigma$ ) from the hypothetical normal distribution of cell resistances  
246 (Figure 1B, bottom panel). This standard deviation reflects the extent of heteroresistance, as if the  
247 difference between  $MIC^{EXP}$  values for different inoculum sizes increases, the normal distribution will  
248 have a broader bell curve, reflecting increased heteroresistance. In addition, this curve can be

249 extrapolated to estimate the mean of the normal distribution, reflecting the population-median  
250 resistance ( $IC_{50}$ , peak of the bell curve).

251 Pre-culture of yeasts was carried out as described above. Exponential phase cells were diluted to  
252  $OD_{600} \sim 0.2$  (inoculum size in  $75\mu\text{l} \sim 100,000$  cells) and serially diluted three times by 10-fold, giving a  
253 lowest  $OD_{600} \sim 0.0002$  (inoculum size in  $75\mu\text{l} \sim 100$  cells). Aliquots ( $75\mu\text{l}$ ) of each inoculum size were  
254 transferred to wells of a flat-bottom, 96-well microplate (StarLab) and combined with  $75\mu\text{l}$  of YEPD  
255 broth pre-supplemented with sorbic acid at double the desired, final sorbic acid concentration. After  
256 sealing with insulating tape, microplates were agitated at 600 rev/min for 60 s, placed in a sealed  
257 plastic bag, and incubated statically at  $23^\circ\text{C}$  for 21 days. The presence or absence of growth was  
258 noted visually under  $\sim 2X$  magnification using a magnifying glass. The lowest concentration at which  
259 no growth was detected in  $\geq 1$  of four technical replicates was scored as the experimental MIC  
260 ( $MIC^{EXP}$ ) for that inoculum from that biological replicate of the relevant isolate.

261 For inoculum effect measurements with the small panel of *Zygosaccharomyces* strains (Table S3),  
262 the procedure was carried out as above but using inoculum sizes of  $10^5$ ,  $10^4$ ,  $10^3$  and  $10^2$  cells/well,  
263 with concentration increments of 0.125 mM sorbic acid. For these particular assays, precise  
264 inoculum size was verified by plating  $75\mu\text{l}$  aliquots of the  $OD_{600} \sim 0.0002$  suspension (100 cells) on  
265 YEPD agar and incubating at  $23^\circ\text{C}$  for 7 days, the corresponding colony count was taken as the  
266 inoculum size of the lowest inoculum. The  $MIC^{EXP}$  results were fitted to a normal or lognormal  
267 distribution curve as described below.

#### 268 Fitting to normal and lognormal distributions

269 Royston et al. (1982) describe a formula to determine the expected value of the maximum of  $n$   
270 random variables from a normal distribution ( $x_1, \dots, x_n$ ), in terms of the theoretical mean ( $\mu$ ) and SD  
271 ( $\sigma$ ) of that distribution (Eq.1).

$$E[\max(x_1, \dots, x_n)] = \mu + \sigma * \text{qnorm}((n - \pi/8)/(n - \pi/4 + 1)) \quad (\text{Eq.1})$$

272

273 Assuming that the frequency distribution of antimicrobial resistance of  $n$  single cells from a  
274 homogeneous cell culture is approximated by a normal (or log-normal) one, this equation can be  
275 used to find the  $IC_{50}$  (the mean) and heteroresistance (the standard deviation) using data for  $MIC^{EXP}$   
276 and their corresponding inoculum sizes ( $x$ ).

277 Equation 1 was fitted to experimental data using non-linear least squares fitting, by using the `nls()`  
278 function in R, to return  $IC_{50}$  and heteroresistance values for each biological replicate. These were  
279 then used to calculate  $MIC^{MODEL}$  by taking the concentration value at the 99.99th percentile of the  
280 curve (where growth inhibition would occur in 99.99% of cells; Box 1). For each parameter, the mean  
281 and standard error of the mean (SEM) across biological replicates were taken.

282 Plotting of curves for  $MIC^{EXP}$  versus inoculum size was carried out using the `ggplot` package in R.  
283 Bootstraps to display 95% confidence interval of the line fitting were calculated using the `Boot`  
284 function in the 'car' package in R.

285 For dose-response data, sorbic acid concentration values and their corresponding percentage  
286 survival values were fitted to one minus a cumulative normal distribution function with mean and  
287 standard deviation equal to the  $IC_{50}$  and heterogeneity, respectively. Fitting was done using  
288 the `nls()` function in R software. Mean and SEM of each parameter were taken from the fitted curve  
289 as for dose response curves detailed above.

290 Normal or lognormal distribution curves fitted to data were displayed in R (`ggplot` package), in the  
291 case of inoculum effect data, and were displayed using the `plot()` function in MATLAB R20119b in the  
292 case of dose-response curve data. Box and whisker plots, bar charts and correlation plots were  
293 produced using Graphpad PRISM 9™ software. Correlations containing points with error bars were  
294 produced using Microsoft Excel.

295 Simulations

296 Simulation of hypothetical normal distributions for single cell resistances of organisms (for  
297 illustration of the inoculum effect concept) were produced using MATLAB R20119b. The Normal  
298 Probability Density Function (normpdf) was used to plot frequency distributions for low and high  
299 heteroresistance organisms ( $\mu=5$ ,  $\sigma=0.1$  and  $\mu=5$ ,  $\sigma=0.1$ , respectively) with the frequency distribution  
300 divided by ten to simulate the small inoculum size.

301 Data availability

302 All data are available in the present results section, in the supplemental material or on request.

303 Genome sequence accession or sample numbers (ENA) are given above and in Table S1.

## 304 Results

### 305 Use of the inoculum effect for determining heteroresistance

306 In order to assess the contributions made by phenotypic heterogeneity (specifically, sorbic acid  
307 heteroresistance) and  $IC_{50}$  to the MIC, across large panels of species or strains, a new assay for  
308 measuring these parameters was developed based on the ‘inoculum effect’ (See methods; Steels et  
309 al. 2000), to allow higher throughput than traditional measurements of heteroresistance such as  
310 from agar-based dose-response curve assays (Hewitt et al., 2016). Briefly, this method fitted a  
311 normal distribution curve of single cell resistances to experimental MIC ( $MIC^{EXP}$ ) values, by modelling  
312  $MIC^{EXP}$  for a given inoculum as its corresponding point on the normal distribution curve (Figure 1B,  
313 top), e.g.,  $MIC^{EXP}$  for 100 cells/well is the point where 1 in 100 cells would survive,  $MIC^{EXP}$  for 1000  
314 cells/well is the point where 1 in 1000 cells would survive, etc. (see Methods). The median and  
315 standard deviation of the fitted normal distribution curve (Figure 1B, bottom) could then be taken as  
316 the  $IC_{50}$  and heteroresistance respectively.

317 For purposes of curve fitting, lognormal distributions were adopted as these gave better fit to dose  
318 response curve data than normal distributions (Figure S1). In addition, possible effect specifically of  
319 cell density (cell concentration) on the probability of growth occurring in a well was evaluated, e.g.,  
320 due to stressor saturation or quorum sensing-type phenomena, as such effect could complicate  
321 interpretation of the inoculum effect which infers a total cell number effect. Only a minor possible  
322 effect of cell density was apparent, and similarly in high or low heteroresistance isolates (Figure S2).  
323 This result supported the inference that differences measured with inoculum effect methodology  
324 primarily reflected differences in heteroresistance rather than effects attributable to altered cell  
325 density.

326 To further assess the use of the inoculum effect method,  $IC_{50}$  (Figure 2A), heteroresistance (Figure  
327 2B) and MIC (Figure 2C) determinations for six randomly selected strains from the

328 *Zygosaccharomyces* panel (Table 1) were compared between the inoculum effect method and the  
329 dose-response curve method. The parameter  $MIC^{MODEL}$  was also taken, defined as the lowest  
330 concentration giving 99.99% inhibition of cell growth (Box 1) and consistent with previous  
331 publications in this field (Stratford et al. 2013b, 2014). This was calculated using the equation for the  
332 lognormal distribution curve fitted to  $MIC^{EXP}$  data (as in Figure 1B). For inoculum effect assays  
333 (carried out in broth), heteroresistance showed a moderately strong, significant correlation with  
334 heteroresistance values derived from dose-response curves ( $r=0.74$ ), while  $IC_{50}$  and  $MIC^{MODEL}$  also  
335 showed strong correlations between the assays ( $r=0.853$  and  $0.865$ , respectively). The inoculum  
336 effect assay was repeated on agar to assess possible effects of broth- versus agar-based assay  
337 formats (as in the above comparison) on the outcomes (Figure S3). Similar correlations were  
338 obtained as above indicating that for all the test parameters ( $IC_{50}$ , heteroresistance and  $MIC^{MODEL}$ ),  
339 dose response results generally compare well with inoculum effect results obtained either in broth  
340 or on agar. These results supported use of the inoculum effect methodology, using a lognormal  
341 distribution for data, as an alternative heteroresistance assay to the established, but time-  
342 consuming dose-response curve method. Further assays below used the broth condition for  
343 inoculum effect assay, which offers higher throughput than on agar and is a condition also more  
344 relevant to the beverages and other product types in which sorbic acid is normally used.

#### 345 High-throughput determination of survival parameters for *Zygosaccharomyces* isolates

346 To investigate relationships between heteroresistance or  $IC_{50}$  with  $MIC^{MODEL}$ , we applied the  
347 inoculum effect methodology to a panel of *Zygosaccharomyces* sp. Isolates. To select strains for  
348 study, an initial panel of 111 yeasts isolated from foods (see Table S1) were whole-genome  
349 sequenced (WGS); most of these had previously been considered as *Z. bailii* isolates (Stratford et al.  
350 2013b, 2014, 2019). The sequencing revealed that several isolates previously characterised as *Z.*  
351 *bailii* were in fact *Z. parabailii* or *Z. pseudobailii* (see Methods). These species are known interspecies  
352 hybrids formed between *Z. bailii* and unknown, closely related ancestors. From these 111 isolates,



353 for further study a panel of 29 strains were selected, to include isolates sampled from across the  
354 span of the phylogenetic tree (Figure S5) and diverse sources of isolation. This ‘Main  
355 *Zygosaccharomyces* panel’ comprised 5, 17 and 7 isolates of *Z. bailii*, *Z. parabailii* and *Z. pseudobailii*  
356 respectively (Table 1). For parameter measurement (heteroresistance,  $IC_{50}$  and  $MIC^{MODEL}$ ) inoculum  
357 effect methodology was used, with curves fitted to  $MIC^{EXP}$  values taken at  $10^5$  and  $10^2$  cells/well.  
358 There was considerable variation in heteroresistance,  $IC_{50}$ , and  $MIC^{MODEL}$  among isolates of the panel,  
359 with ranges of approximately 0.03–0.11, 2.3–5.4 and 4.3–9.2 mM for heteroresistance,  $IC_{50}$  and  
360  $MIC^{MODEL}$ , respectively (Table 1; Figure 3A). Analysis for each subspecies indicated that *Z. pseudobailii*  
361 had a significantly greater mean heteroresistance than *Z. parabailii* and *Z. bailii*, whereas the mean  
362  $IC_{50}$  for *Z. pseudobailii* was significantly lower than for *Z. parabailii* (Figure 3B). There were no  
363 significant differences in average  $MIC^{MODEL}$  between the different subspecies (two sample t-test  
364 assuming unequal variances), although there was both a broader spread of values and relatively low  
365 mean for *Z. bailii* isolates (Figure 3B).

366 To further investigate the relationships between heteroresistance,  $IC_{50}$  and  $MIC^{MODEL}$ , the correlation  
367 between these parameters was calculated. Across the main *Zygosaccharomyces* panel of 29 strains,  
368 strains with high  $IC_{50}$  tended to have high  $MIC^{MODEL}$  and *vice versa* ( $r=0.675$ ,  $p<0.0001$ ), whereas  
369 heteroresistance was not significantly correlated with  $MIC^{MODEL}$  ( $r=0.326$ ,  $p=0.08$ ) (Figure 4A).  
370 Unexpectedly, strains with a high  $IC_{50}$  tended to have a low heteroresistance ( $r=0.586$ ,  $p<0.01$ )  
371 (Figure 4A). When the subspecies were examined independently, *Z. bailii* (Figure 4B), *Z. parabailii*  
372 (Figure 4C) and *Z. pseudobailii* (Figure 4D) also each showed a significant correlation between  $IC_{50}$  and  
373  $MIC^{MODEL}$  and no significant correlation between heteroresistance and  $MIC^{MODEL}$ . In the case of *Z.*  
374 *parabailii*, it was noted that calculated correlations were strongly influenced by a single isolate  
375 (3698) with a much lower  $IC_{50}$  than all the other *Z. parabailii* isolates (Figure 4C). When the *Z.*  
376 *parabailii* dataset was analysed without this single isolate ( $n=16$ ), heteroresistance was strongly  
377 correlated with  $MIC^{MODEL}$  ( $r=0.660$ ,  $p<0.01$ ) and  $IC_{50}$  was not ( $r=0.265$ ,  $p=0.32$ ) (Figure S4). The  
378 correlation between heteroresistance and  $MIC^{MODEL}$  in this sample could suggest that

379 heteroresistance is more strongly related to  $MIC^{MODEL}$  when variation in  $IC_{50}$  is relatively limited, as  
380 was the case in *Z. parabailii* after removal of isolate 3698 (see Discussion).

381 Trends in heteroresistance,  $IC_{50}$  and  $MIC^{MODEL}$  across a wide panel of diverse yeast species

382 To investigate if the trends in sorbic acid heteroresistance described above may be replicated in  
383 other spoilage yeast species, dose response curve data from a 'wide panel' of spoilage yeasts isolates  
384 (Table S2) produced in a previous survey were analysed. These isolates encompassed 26 species  
385 from 12 different yeast genera. Three *Z. parabailii* and two *S. cerevisiae* strains were present in the  
386 panel, whereas all other species were represented by one isolate only. To avoid mixing intra- with  
387 inter-species comparisons, values averaged across the three *Z. parabailii* and across the two *S.*  
388 *cerevisiae* isolates were used for these two species. This wide yeast panel produced a notably wider  
389 range of  $IC_{50}$  and  $MIC^{MODEL}$  values than the main *Zygosaccharomyces* panel (Figure 5A,B). This was  
390 primarily due to comparatively low  $IC_{50}$  and  $MIC^{MODEL}$  values for certain species of the wide panel,  
391 such as *Rhodotorula mucilaginosa* ( $IC_{50}$ ~0.337mM,  $MIC^{MODEL}$ ~0.467 mM) and *Zygosaccharomyces*  
392 *rouxii* ( $IC_{50}$ ~1.34mM,  $MIC^{MODEL}$ ~2.45mM), two species previously associated with food environments  
393 where sorbic acid is not used (Pitt & Hocking, 2009). The two panels exhibited similar variation in  
394 heteroresistance between isolates, but the *Zygosaccharomyces* isolates showed significantly higher  
395 mean heteroresistance ( $p < 0.0001$ ) (Figure 5B).  $IC_{50}$  was very strongly correlated with  $MIC^{MODEL}$  in the  
396 wide panel ( $r=0.986$ ,  $p < 0.0001$ ) (Figure 5C). The wide panel also showed a weaker correlation  
397 between heteroresistance and  $MIC^{MODEL}$  ( $r = 0.487$ ,  $p < 0.05$ ). There was a weak, non-significant  
398 correlation between heteroresistance and  $IC_{50}$ , which was weaker than that with  $MIC^{MODEL}$   
399 suggesting that the relationship between heteroresistance and  $MIC^{MODEL}$  was not simply a reflection  
400 of the strong relationship between  $IC_{50}$  and  $MIC^{MODEL}$ . The results collectively indicate a close  
401 relationship between MIC and population-median resistance ( $IC_{50}$ ) and additionally, albeit relatively  
402 weakly, with heteroresistance, as discussed below.

403



## 405 Discussion

406 This study showcases the relevance of  $IC_{50}$  and heteroresistance parameters for an inhibitor's MIC  
407 against organisms, here focussing on the preservative sorbic acid. The novel, high-throughput  
408 inoculum effect methodology developed here allowed heteroresistance to be determined in a large  
409 number of microorganisms, in a manner less laborious than an established method like dose-  
410 response assay on agar. In addition, the microplate format of the new assay demands only modest  
411 physical incubator space and is amenable to automation. This methodology offers the potential for  
412 screens of heteroresistance in new ecological or industrial contexts, for example in modelling and  
413 quantitative risk assessments in the food industry. Our results indicate that a dominant indicator of  
414 differences in MIC between strains is differences in  $IC_{50}$ , with heteroresistance (e.g. incidence of  
415 rare, hyper-resistant cells) playing a smaller role.

416 The experimental data were consistent with lognormal distributions of single-cell resistances in the  
417 yeast cell populations. Hill functions have previously been employed to model dose response curves  
418 using  $\log_{10}$  values for stressor concentration (Geoghegan et al., 2020; Stratford et al. 2019), a model  
419 which assumes single-cell resistances are lognormally distributed. Here, while the fit of the  
420 lognormal distribution curve to the data was only marginally better than a normal distribution, for  
421 this study we were more interested in differences in relative distributions of single cell resistances,  
422 therefore lognormal was suited to the study's aims.

423 The possibility that cell-concentration may make a contribution to the inoculum effect that is  
424 independent of effects due to resistant-cell incidence was investigated, e.g., arising from stressor  
425 saturation or quorum sensing-type phenomena, for example. Some previous reports of the inoculum  
426 effect have not made this distinction (Loffredo et al. 2020, Smith et al., 2018). However, Scheler et  
427 al. (2020) demonstrated that inoculum effect in *E. coli* for cefotaxime resulted from heteroresistance  
428 rather than cell concentration, while Steels et al. (2000) ruled out certain effects of cell  
429 concentration (e.g. altered adsorption) in the inoculum effect of *Z. bailii* with sorbic acid. On the

430 other hand, cell concentration affected survival probability of heat-shocked *S. cerevisiae*, attributed  
431 to cooperative glutathione excretion at high cell density (Laman Trip & Youk, 2020). To our  
432 knowledge, no such mechanisms have been reported for sorbic acid stress. Here, analyses indicated  
433 that cell concentration may make only a minor contribution to the increasing sorbic acid MIC<sup>MODEL</sup> as  
434 inoculum size was increased (between 10<sup>2</sup> and 10<sup>4</sup> cells per well). One possible explanation for that  
435 small effect could be related to the documented metabolism of sorbic acid by *Z. bailii* (Mollapour  
436 and Piper, 2001).

437 Heteroresistance, IC<sub>50</sub> and MIC<sup>MODEL</sup> values obtained on agar (from dose response assay) showed  
438 significant correlation with the same parameters obtained in broth (from inoculum effect assay).  
439 This consistency for all three parameters whether measured in broth or agar is in line with work  
440 elsewhere reporting similar resistances to other stressors in broth versus agar (Morris et al., 2020;  
441 Albano et al., 2021; Fuchs et al., 2021). Robustness of the heteroresistance phenotype to the form of  
442 growth environment is consistent with heteroresistance being an intrinsic property of cell  
443 populations, not strongly affected by environment. This property allows resistant subpopulations to  
444 arise independent of stressor exposure, for example, so enabling pre-priming for possible future  
445 perturbations. Such pre-priming of heteroresistance has been described for other stressor scenarios  
446 (Jing et al. 2018, Levy et al., 2012; Stratford et al. 2014), and is in line with understanding of the  
447 wider premise for phenotypic heterogeneity, or bet-hedging (Avery, 2006; Ackermann, 2015).

448 There was considerable variation in all three parameters between strains and species of the  
449 *Zygosaccharomyces* genus and across a wider panel of spoilage yeast species. *Z. bailii* is considered  
450 as more heteroresistant to sorbic acid than *S. cerevisiae* (Stratford et al. 2014). Across the main  
451 *Zygosaccharomyces* panel and the constituent subspecies, IC<sub>50</sub> was more clearly correlated with  
452 MIC<sup>MODEL</sup> than was heteroresistance. However, in the case of *Z. parabailii* this trend was reversed by  
453 the removal of a single outlying strain with an uncharacteristically low IC<sub>50</sub> value. The removal of this  
454 outlier considerably reduced the variation in IC<sub>50</sub> for the subspecies (standard deviation reduced to

455 0.055 from 0.076) but had negligible impact on variation in heteroresistance (standard deviations  
456 0.0188 and 0.0186). This could suggest that relationships between heteroresistance and MIC are  
457 masked when  $IC_{50}$  variation is high and potentially dominating effects on MIC across different  
458 organisms. Accordingly, heteroresistance may be more important for MIC in species or contexts that  
459 support lower variation in  $IC_{50}$ .

460 Regarding the question of why one (sub-)species might evolve a higher average preservative  
461 heteroresistance than others (e.g. *Z. pseudobailii*, Figure 3B), drivers could be related to the  
462 organisms' ecologies or relative incidences. This may include the size of inoculum typically  
463 associated with spoilage incidence of an organism, as larger inocula could amplify the effect that  
464 heteroresistance has on the MIC. Alternatively, the frequency of transition of the growth  
465 environment from preservative-rich to -poor, as frequent changes are thought to favour high  
466 heterogeneity (Avery, 2006). Modelling of gene expression patterns has indicated that gene  
467 expression noise confers a stronger fitness advantage when population-averaged gene expression is  
468 further from the optimal level (Duveau et al. 2018), a situation more often encountered in  
469 fluctuating environments. Regarding the particular example of this study, a less stable niche for *Z.*  
470 *pseudobailii* is partially supported by this organism being found primarily in viscous foodstuffs (Table  
471 1), although a similar argument could be made for *Z. parabailii* (where average heteroresistance was  
472 lower) which colonises solid as well as liquid foodstuffs.

473 There was a negative correlation between heteroresistance and  $IC_{50}$  across the main  
474 *Zygosaccharomyces* panel. One suggestion to explain this might be that heteroresistance is more  
475 strongly selected in low- $IC_{50}$  strains in compensation for a disparity between their population-  
476 median resistance ( $IC_{50}$ ) and optimal resistance when faced with stressor. That would be in line with  
477 other previously described scenarios, including the example mentioned above where noisy gene  
478 expression is especially beneficial when average gene expression is far from the optimum (Duveau et  
479 al. 2018).

480 Other trends were evident here across a wider panel of spoilage yeast species. In particular, a weak  
481 but significant positive correlation between heteroresistance and MIC emerged. This suggests that  
482 heteroresistance may make a larger contribution to MIC differences between distantly related  
483 species of spoilage yeasts than across individual isolates of the *Zygosaccharomyces* genus. At the  
484 same time, a correlation between IC<sub>50</sub> and MIC in the wide panel was stronger than in the main  
485 *Zygosaccharomyces* panel, possibly reflecting the wider range of IC<sub>50</sub> phenotypes across the wide  
486 panel. While specific trends were different between the two panels the overall conclusion was  
487 similar, that IC<sub>50</sub> is more closely related than heteroresistance to preservative MIC.

488 Why heteroresistance has not been strongly associated with sorbic acid resistance in this study  
489 requires consideration. One explanation is that if the metabolic cost to a cell of resisting sorbic acid  
490 stress is low, the fitness benefit of bet-hedging over increasing population-average resistance would  
491 be reduced. While some strategies for sorbic acid resistance such as increased expression of efflux  
492 pumps (Geoghegan et al. 2020) would be metabolically costly, favouring heteroresistance (Jing et al.  
493 2018), other proposed resistance mechanisms such as potential maintenance of a more  
494 fermentative metabolism (Stratford et al. 2020) might confer resistance at a comparably low cost,  
495 mitigating the fitness benefit of heteroresistance over IC<sub>50</sub>. It is possible that stronger  
496 heteroresistance phenotypes would be found in niches where the metabolic cost of pre-priming (all)  
497 cells for stress was greater. A possibly-related observation was overrepresentation of the high-IC<sub>50</sub>,  
498 low-heteroresistance species *Z. parabailii* in the initial *Zygosaccharomyces* panel used in this study  
499 (n=71, 19 and 21 for *Z. parabailii*, *Z. pseudobailii* and *Z. bailii* respectively, Table S1). As this reflects  
500 isolation of *Z. parabailii* from a larger number of food spoilage events, it is consistent with the  
501 suggestion that a high IC<sub>50</sub> as opposed to high heteroresistance may be a more effective evolutionary  
502 strategy for growing in preserved foods, though of course we cannot discount that other traits of *Z.*  
503 *parabailii* account for its preponderance. It should also be noted that this study was limited to food  
504 spoilage isolates only and other relationships may be manifest in other ecological niches.

## 505 Conclusion

506 We capitalised on the inoculum effect principle to develop a new, high-throughput method for  
507 assaying heteroresistance. Application of this assay to diverse spoilage yeasts revealed that  
508 heteroresistance and especially IC<sub>50</sub> are related to MIC, whereas a relationship with heteroresistance  
509 was not observed when considering a panel only of *Zygosaccharomyces* sp. isolates. Overall, IC<sub>50</sub>  
510 appears to be a strong indicator of MIC, but heteroresistance may also be related to MIC between  
511 distantly related species or in contexts where IC<sub>50</sub> variation is low. This work highlights certain  
512 limitations of conventional MIC measurements as, due to the effect of heteroresistance, the  
513 apparent resistance of an organism could vary markedly according to inoculum size. The average  
514 resistance of a cell population, its heteroresistance and the inoculum size should all be considered in  
515 selecting appropriate antimicrobial concentrations for specific applications, e.g., food preservation.  
516 In experimental work (e.g. in microbial challenge testing) this would translate to using an adequate  
517 population size (e.g. 10<sup>4</sup> cells) in the desired test volume.

518

## 519 Acknowledgements

520 This work was supported by the Biotechnology and Biological Sciences Research Council (grant  
521 number B/T508949/1). We thank Malcolm Stratford for kindly sharing yeast isolates and data.

522



## 523 References

- 524 ACKERMANN, M. 2015. A functional perspective on phenotypic heterogeneity in microorganisms.  
525 Nature Reviews Microbiology, 13, 497-508.
- 526 ALBANO, M., KARAU, M. J., SCHUETZ, A. N. & PATEL, R. 2020. Comparison of agar dilution to broth  
527 microdilution for testing in vitro activity of cefiderocol against Gram-negative bacilli. Journal of  
528 Clinical Microbiology, 59, e00966-20.
- 529 ANDERSSON, D. I., NICOLOFF, H. & HJORT, K. 2019. Mechanisms and clinical relevance of bacterial  
530 heteroresistance. Nature Reviews Microbiology, 17, 479-496.
- 531 BISHOP, A. L., RAB, F. A., SUMNER, E. R. & AVERY, S. V. 2007. Phenotypic heterogeneity can enhance  
532 rare-cell survival in 'stress-sensitive' yeast populations. Molecular Microbiology, 63, 507-520.
- 533 BRAUN-GALLEANI, S., ORTIZ-MERINO, R. A., WU, Q., XU, Y. & WOLFE, K. H. 2018. *Zygosaccharomyces*  
534 *pseudobailii*, another yeast interspecies hybrid that regained fertility by damaging one of its *MAT*  
535 loci. FEMS Yeast Research, 18, foy079.
- 536 DATEMA, E., HULZINK, R. J., BLOMMERS, L., VALLE-INCLAN, J. E., VAN ORSOUW, N., WITTENBERG, A.  
537 H. & DE VOS, M. 2016. The megabase-sized fungal genome of *Rhizoctonia solani* assembled from  
538 nanopore reads only. bioRxiv, 084772.
- 539 DAVIES, C. R., WOHLGEMUTH, F., YOUNG, T., VIOLET, J., DICKINSON, M., SANDERS, J.-W., VALLIERES,  
540 C. & AVERY, S. V. 2021. Evolving challenges and strategies for fungal control in the food supply chain.  
541 Fungal Biology Reviews, 36, 15-26.
- 542 DEWACHTER, L., FAUVART, M. & MICHIELS, J. 2019. Bacterial heterogeneity and antibiotic survival:  
543 understanding and combatting persistence and heteroresistance. Molecular Cell, 76, 255-267.

- 544 DUVEAU, F., HODGINS-DAVIS, A., METZGER, B. P., YANG, B., TRYBAN, S., WALKER, E. A., LYBROOK, T.  
545 & WITTKOPP, P. J. 2018. Fitness effects of altering gene expression noise in *Saccharomyces*  
546 *cerevisiae*. eLife, 7, e37272.
- 547 FUCHS, F., HOF, H., HOFMANN, S., KURZAI, O., MEIS, J. F. & HAMPRECHT, A. 2021. Antifungal activity  
548 of nitroxoline against *Candida auris* isolates. Clinical Microbiology and Infection, 27, 1697.e7-  
549 1697.e10.
- 550 GEOGHEGAN, I. A., STRATFORD, M., BROMLEY, M., ARCHER, D. B. & AVERY, S. V. 2020. Weak acid  
551 resistance A (WarA), a novel transcription factor required for regulation of weak-acid resistance and  
552 spore-spore heterogeneity in *Aspergillus niger*. mSphere, 5, e00685-19.
- 553 HEWITT, S. K., FOSTER, D. S., DYER, P. S. & AVERY, S. V. 2016. Phenotypic heterogeneity in fungi:  
554 importance and methodology. Fungal Biology Reviews, 30, 176-184.
- 555 HOLLAND, S. L., READER, T., DYER, P. S. & AVERY, S. V. 2014. Phenotypic heterogeneity is a selected  
556 trait in natural yeast populations subject to environmental stress. Environmental Microbiology, 16,  
557 1729-1740.
- 558 JING, W., CAMELLATO, B., RONEY, I. J., KAERN, M. & GODIN, M. 2018. Measuring single-cell  
559 phenotypic growth heterogeneity using a microfluidic cell volume sensor. Scientific Reports, 8, 1-10.
- 560 KHAN, H. A., ARIF, I. A., BAHKALI, A. H., FARHAN, A. H. A. & HOMAIDAN, A. A. A. 2008. Bayesian,  
561 maximum parsimony and UPGMA models for inferring the phylogenies of antelopes using  
562 mitochondrial markers. Evolutionary Bioinformatics, 4, EBO.S934.
- 563 LAMAN TRIP, D. S. & YOUK, H. 2020. Yeasts collectively extend the limits of habitable temperatures  
564 by secreting glutathione. Nature Microbiology, 5, 943-954.
- 565 LEVY, S. F., ZIV, N. & SIEGAL, M. L. 2012. Bet hedging in yeast by heterogeneous, age-correlated  
566 expression of a stress protectant. PLoS Biology, 10, e1001325.

- 567 LINDAHL, L., GENHEDEN, S., ERIKSSON, L. A., OLSSON, L. & BETTIGA, M. 2016. Sphingolipids  
568 contribute to acetic acid resistance in *Zygosaccharomyces bailii*. Biotechnology and Bioengineering,  
569 113, 744-753.
- 570 LINDBERG, L., SANTOS, A. X., RIEZMAN, H., OLSSON, L. & BETTIGA, M. 2013. Lipidomic profiling of  
571 *Saccharomyces cerevisiae* and *Zygosaccharomyces bailii* reveals critical changes in lipid composition  
572 in response to acetic acid stress. PloS One, 8, e73936.
- 573 LIU, J., LESTRADE, D., ARABACIYAN, S., CESCUT, J., FRANÇOIS, J.-M. & CAPP, J.-P. 2018. A *GRX1*  
574 promoter variant confers constitutive noisy bimodal expression that increases oxidative stress  
575 resistance in yeast. Frontiers in Microbiology, 9, 2158.
- 576 LOFFREDO, M. R., SAVINI, F., BOBONE, S., CASCIARO, B., FRANZYK, H., MANGONI, M. L. & STELLA, L.  
577 2021. Inoculum effect of antimicrobial peptides. Proceedings of the National Academy of Sciences,  
578 118, e2014364118.
- 579 MOLLAPOUR, M. & PIPER, P. W. 2001. The *ZbYME2* gene from the food spoilage yeast  
580 *Zygosaccharomyces bailii* confers not only *YME2* functions in *Saccharomyces cerevisiae*, but also the  
581 capacity for catabolism of sorbate and benzoate, two major weak organic acid preservatives.  
582 Molecular Microbiology, 42, 919-930.
- 583 MORRIS, C. P., BERGMAN, Y., TEKLE, T., FISSEL, J. A., TAMMA, P. D. & SIMNER, P. J. 2020. Cefiderocol  
584 antimicrobial susceptibility testing against multidrug-resistant Gram-negative bacilli: a comparison of  
585 disk diffusion to broth microdilution. Journal of Clinical Microbiology, 59, e01649-20.
- 586 NEWMAN, J. R., GHAEMMAGHAMI, S., IHMELS, J., BRESLOW, D. K., NOBLE, M., DERISI, J. L. &  
587 WEISSMAN, J. S. 2006. Single-cell proteomic analysis of *S. cerevisiae* reveals the architecture of  
588 biological noise. Nature, 441, 840-846.
- 589 PITT, J. I. & HOCKING, A. D. 2009. Fungi and food spoilage, 3rd ed. Springer, New York.
- 590 ROYSTON, J. P. 1982. Journal of the Royal Statistical Society. Series C (Applied Statistics), 31, 161-165

591 SCHELER, O., MAKUCH, K., DEBSKI, P. R., HORKA, M., RUSZCZAK, A., PACOCHA, N., SOZAŃSKI, K.,  
592 SMOLANDER, O.-P., POSTEK, W. & GARSTECKI, P. 2020. Droplet-based digital antibiotic susceptibility  
593 screen reveals single-cell clonal heteroresistance in an isogenic bacterial population. Scientific  
594 Reports, 10, 1-8.

595 SILANDER, O. K., NIKOLIC, N., ZASLAVER, A., BREN, A., KIKOIN, I., ALON, U. & ACKERMANN, M. 2012.  
596 A genome-wide analysis of promoter-mediated phenotypic noise in *Escherichia coli*. PLoS genetics, 8,  
597 e1002443.

598 SMITH, K. P. & KIRBY, J. E. 2018. The inoculum effect in the era of multidrug resistance: minor  
599 differences in inoculum have dramatic effect on MIC determination. Antimicrobial Agents and  
600 Chemotherapy, 62, e00433-18.

601 SMITH, M. C., SUMNER, E. R. & AVERY, S. V. 2007. Glutathione and Gts1p drive beneficial variability  
602 in the cadmium resistances of individual yeast cells. Molecular Microbiology, 66, 699-712.

603 STEELS, H., JAMES, S.A., ROBERTS, I.N. & STRATFORD M. 2000. Sorbic acid resistance: the inoculum  
604 effect. Yeast, 16, 1173-1183

605 STIRLING, D. 2003. DNA extraction from fungi, yeast, and bacteria. In Methods in Molecular Biology:  
606 PCR Protocols, Vol. 226, 2nd ed., ed. by Bartlett, J. M. S. & Stirling, D., Humana Press Inc., Totowa,  
607 NJ, U.S.A., pp. 53–54.

608 STRATFORD, M., NEBE-VON-CARON, G., STEELS, H., NOVODVORSKA, M., UECKERT, J. & ARCHER, D.  
609 B. 2013. Weak-acid preservatives: pH and proton movements in the yeast *Saccharomyces cerevisiae*.  
610 International journal of food microbiology, 161, 164-171.

611 STRATFORD, M., STEELS, H., NEBE-VON-CARON, G., AVERY, S. V., NOVODVORSKA, M. & ARCHER, D.  
612 B. 2014. Population heterogeneity and dynamics in starter culture and lag phase adaptation of the  
613 spoilage yeast *Zygosaccharomyces bailii* to weak acid preservatives. International journal of food  
614 microbiology, 181, 40-47.

615 STRATFORD, M., STEELS, H., NEBE-VON-CARON, G., NOVODVORSKA, M., HAYER, K. & ARCHER, D. B.  
616 2013. Extreme resistance to weak-acid preservatives in the spoilage yeast *Zygosaccharomyces bailii*.  
617 International Journal of Food Microbiology, 166, 126-134.

618 STRATFORD, M., STEELS, H., NOVODVORSKA, M., ARCHER, D. B. & AVERY, S. V. 2019. Extreme  
619 osmotolerance and halotolerance in food-relevant yeasts and the role of glycerol-dependent cell  
620 individuality. Frontiers in Microbiology, 9, 3238.

621 STRATFORD, M., VALLIÈRES, C., GEOGHEGAN, I. A., ARCHER, D. B. & AVERY, S. V. 2020. The  
622 preservative sorbic acid targets respiration, explaining the resistance of fermentative spoilage yeast  
623 species. mSphere, 5, e00273-20.

624 URCHUEGUÍA, A., GALBUSERA, L., CHAUVIN, D., BELLEMENT, G., JULOU, T. & VAN NIMWEGEN, E.  
625 2021. Genome-wide gene expression noise in *Escherichia coli* is condition-dependent and  
626 determined by propagation of noise through the regulatory network. PLoS Biology, 19, e3001491.

627 ZHANG, M., ZHANG, Y., SCHEURING, C. F., WU, C.-C., DONG, J. J. & ZHANG, H.-B. 2012. Preparation  
628 of megabase-sized DNA from a variety of organisms using the nuclei method for advanced genomics  
629 research. Nature Protocols, 7, 467-478.

630

631

632

633 **Table 1: Main panel of *Zygosaccharomyces* strains, including sorbic acid resistance values.**

| Strain | Alternative reference             | Species*               | Isolation Source/location                     | Heteroresistance (SD, mM) | IC <sub>50</sub> (mM) | MIC <sup>MODEL</sup> (mM) |
|--------|-----------------------------------|------------------------|-----------------------------------------------|---------------------------|-----------------------|---------------------------|
| 1730   |                                   | <i>Z. pseudobailii</i> | Ketchup                                       | 0.0648 <sup>a</sup>       | 3.77                  | 6.69                      |
| 3697   |                                   | <i>Z. pseudobailii</i> | low fat tartare sauce                         | 0.0899                    | 3.16                  | 7.00                      |
| 3698   |                                   | <i>Z. parabailii</i>   | Chow chow                                     | 0.0726                    | 2.41                  | 4.57                      |
| 3699   |                                   | <i>Z. parabailii</i>   | Creamy caesar dressing                        | 0.0453                    | 3.59                  | 5.36                      |
| 3704   |                                   | <i>Z. parabailii</i>   | Ketchup, Russia, 2003                         | 0.0436                    | 4.40                  | 6.47                      |
| 3942   |                                   | <i>Z. parabailii</i>   | Yoghurt mayonnaise                            | 0.0828                    | 3.40                  | 7.07                      |
| 3959   |                                   | <i>Z. parabailii</i>   | Ice Tea concentrate                           | 0.1054                    | 3.56                  | 9.04                      |
| 7406   |                                   | <i>Z. parabailii</i>   | Peach ice tea production environment, Nigeria | 0.0688                    | 4.06                  | 7.46                      |
| 7445   |                                   | <i>Z. parabailii</i>   | Ice tea, Mexico                               | 0.0689                    | 3.58                  | 6.58                      |
| 7768   |                                   | <i>Z. bailii</i>       | Spoiled Ice Tea concentrate, Portugal         | 0.0673                    | 5.06                  | 9.18                      |
| 7769   |                                   | <i>Z. pseudobailii</i> | Tartare Sauce, Poland, 2019                   | 0.0760                    | 3.63                  | 7.11                      |
| 7777   | DBVPG 6378, CECT11933             | <i>Z. parabailii</i>   | Mayonnaise, Netherlands                       | 0.0456                    | 4.08                  | 6.11                      |
| 7788   | CBS 6708                          | <i>Z. bailii</i>       | Orange-juice concentrate, Brazil              | 0.0502                    | 4.11                  | 6.40                      |
| 7800   | MUCL 38950                        | <i>Z. bailii</i>       | fermented tea, 1994                           | 0.0635                    | 2.71                  | 4.76                      |
| 7807   | MUCL 55123                        | <i>Z. parabailii</i>   | Alcoholic fermented beverage, 2012            | 0.0538                    | 3.76                  | 6.05                      |
| 7809   | 2, CBS 685, NCYC 563              | <i>Z. pseudobailii</i> | UK                                            | 0.0857                    | 2.32                  | 4.95                      |
| 7812   | 6 <sup>b,c,d</sup>                | <i>Z. parabailii</i>   | Bottled ice tea, USA                          | 0.0458                    | 4.09                  | 6.13                      |
| 7820   | 15 <sup>b,c,d</sup>               | <i>Z. pseudobailii</i> | Salad dressing, Netherlands                   | 0.0719                    | 3.05                  | 5.77                      |
| 7829   | 105 <sup>b,c,d</sup> , NCYC 2933, | <i>Z. parabailii</i>   | Tomato based product, UK, 2000                | 0.0897                    | 3.37                  | 7.46                      |
| 7836   | 194 <sup>b,c,d</sup> DBVPG 6924   | <i>Z. pseudobailii</i> | Honey, China                                  | 0.0643                    | 3.28                  | 5.80                      |

|      |                                   |                        |                                        |        |      |      |
|------|-----------------------------------|------------------------|----------------------------------------|--------|------|------|
| 7838 | 362 <sup>b,c,d</sup>              | <i>Z. parabailii</i>   | Factory isolate, Turkey                | 0.0345 | 4.35 | 5.91 |
| 7842 | 592 <sup>b,c,d</sup><br>NCYC 3378 | <i>Z. parabailii</i>   | Soft Drinks factory, Phillipines, 2006 | 0.0520 | 4.93 | 7.82 |
| 7843 | 593 <sup>b,c,d</sup><br>NCYC 3379 | <i>Z. bailii</i>       | Factory isolate, Phillipines, 2006     | 0.0653 | 2.92 | 5.20 |
| 7851 | NCYC 464                          | <i>Z. pseudobailii</i> | Sweet pickle, 1955                     | 0.0935 | 3.01 | 6.88 |
| 7852 | NCYC 573                          | <i>Z. bailii</i>       | Red wine, USA, 1959                    | 0.0380 | 3.06 | 4.28 |
| 7862 | NRRL Y-11865                      | <i>Z. parabailii</i>   | Salad Cream, 1985                      | 0.0537 | 3.79 | 6.09 |
| 7870 |                                   | <i>Z. parabailii</i>   | Unknown source, Belgium                | 0.0453 | 5.38 | 8.03 |
| 7871 |                                   | <i>Z. parabailii</i>   | Ice Tea concentrate, Guatemala, 2019   | 0.0647 | 4.22 | 7.49 |
| 7873 |                                   | <i>Z. parabailii</i>   | Yoghurt, Czech Republic, 2019          | 0.0637 | 3.52 | 6.19 |

634 \* verified by WGS analysis (see below)

635 <sup>a</sup> error values for heteroresistance, IC<sup>50</sup> and MIC<sup>MODEL</sup> are shown in Figure 3a

636 <sup>b</sup> as designated by Stratford et al 2019

637 <sup>c</sup> as designated by Stratford et al. 2020

638 <sup>d</sup> as designated by Stratford et al 2013b

639

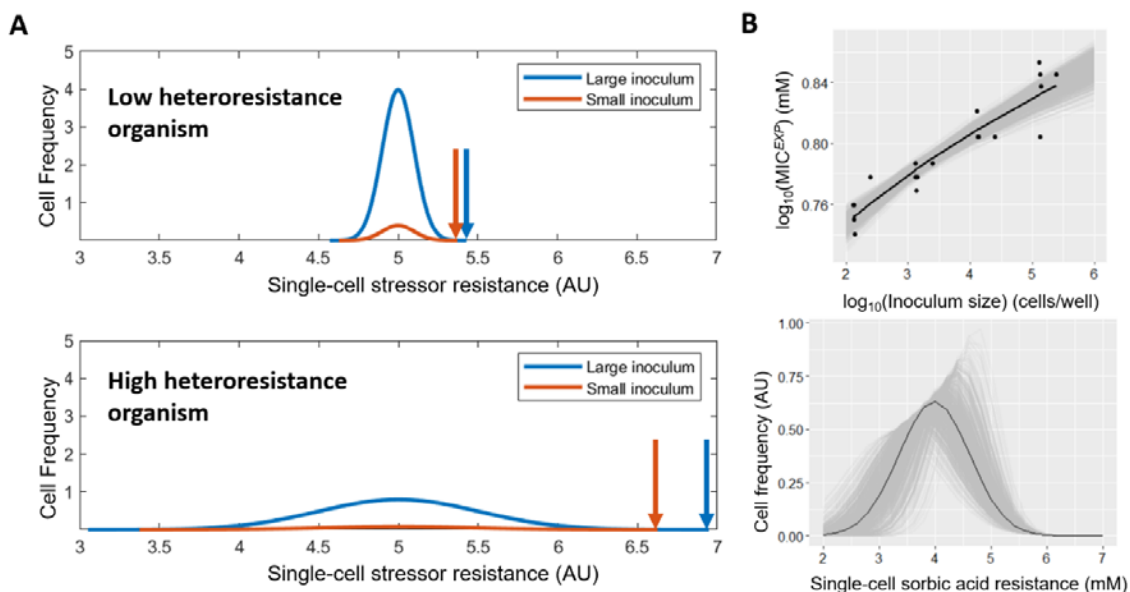

640

641

642 **Figure 1: Establishing parameters for quantifying heteroresistance via the inoculum effect. (A)** Modelled  
643 single-cell frequency distributions of stressor resistance (hypothetical) in low- and high-heteroresistance cell  
644 populations, at large and small inoculum sizes; these are modelled assuming single-cell resistances are  
645 normally distributed in the populations, with the total area under each curve equalling 1 and 0.1 for large and  
646 small inocula, respectively. Plots intersect the x-axis where survivor-cell frequency decreases below 0.001,  
647 corresponding to the theoretical point at which less than one cell of the relevant inoculum survives and  
648 equating to the MIC, indicated with an arrow. AU, arbitrary units. **(B)** Top panel: normal distribution curve  
649 fitted to  $\text{MIC}^{\text{EXP}}$  (Box 1) values for sorbic acid resistance (mM) at four optical densities (each with six replicates  
650 normalised to cells/well according to corresponding colony counts on agar) using inoculum effect methodology  
651 (see Methods) for strain 7812 (n=6 biological replicates). Black line, line of best fit. Grey lines, simulated  
652 normal distributions, with the distance between the upper and lower lines for each x value representing the  
653 95% confidence interval for that point. Bottom panel: Simulation of frequency distribution of single cell  
654 resistances in strain 7812, based on normal distribution curve fitting in panel B (top).

655



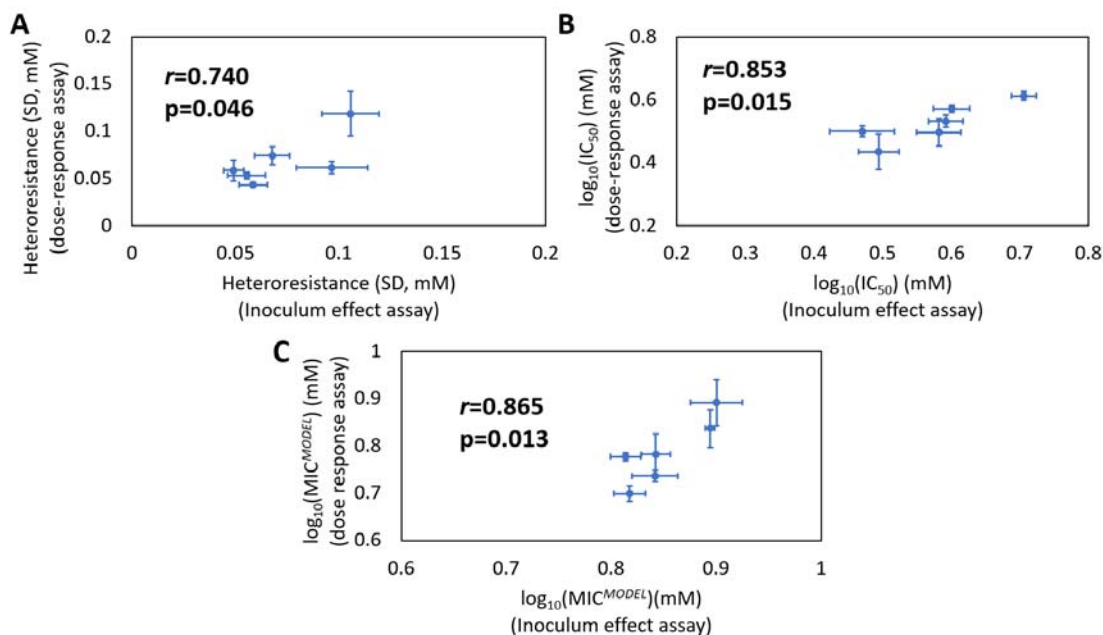

656

657 **Figure 2: Corroboration of inoculum effect assay for measurement of  $\text{IC}_{50}$ , heteroresistance and  $\text{MIC}^{\text{MODEL}}$ .**

658 Comparison of parameter determinations for randomly selected *Z. parabailii*, *Z. bailii* and *Z. pseudobailii*

659 isolates (isolates 7788, 7812, 7851, 7829, 7769, 7842). Values for  $\text{IC}_{50}$  (A), heteroresistance (B) and  $\text{MIC}^{\text{MODEL}}$  (C)

660 were derived either from dose-response curve on agar or inoculum effect assay in broth (using  $\text{MIC}^{\text{EXP}}$  values

661 at two inoculum sizes, see Methods). Points represent means from 6 biological replicates for each isolate +/-

662 SEM, with  $r$  values calculated using linear regression and  $p$  values were calculated using one-tailed linear

663 regression.

664

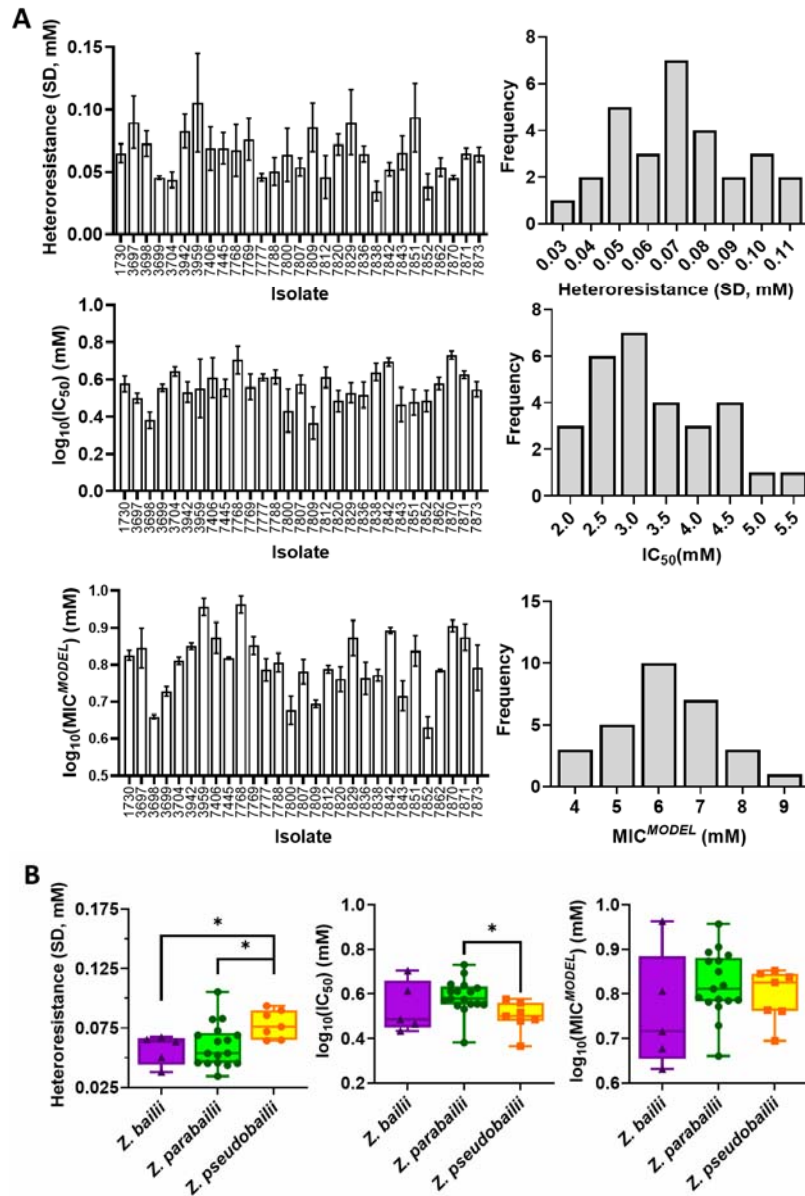

665

666

667

668 **Figure 3: Heteroresistance,  $IC_{50}$  and  $MIC^{MODEL}$  across a panel of 29 *Zygosaccharomyces* sp. isolates grown**  
 669 **with sorbic acid. (A)** Left panels: heteroresistance,  $IC_{50}$  and  $MIC^{MODEL}$  determinations for individual strains.  
 670 Values are means  $\pm$  SEM of average of parameters for three curves independently fitted to each biological  
 671 replicate ( $MIC^{EXP}$  values measured at two inoculum sizes.) Right panels: Frequency histograms showing spread  
 672 of heteroresistance,  $IC_{50}$  and  $MIC^{MODEL}$  in the 29-strain panel (strain list in Table 1). Values on the x axis indicate  
 673 centre of each histogram bin, where divisions between bins were at the midpoints between adjacent values  
 674 shown. **(B)** Data adapted from (A) to compare the distributions of heteroresistance,  $IC_{50}$  and  $MIC^{MODEL}$  among  
 675 the isolates of the three subspecies. Significant differences are indicated (\* $p < 0.05$ ), using two-sample  $t$ -test  
 676 assuming unequal variances ( $n = 5, 17$  and  $7$ , for *Z. bailii*, *Z. parabaailii* and *Z. pseudobailii*, respectively).

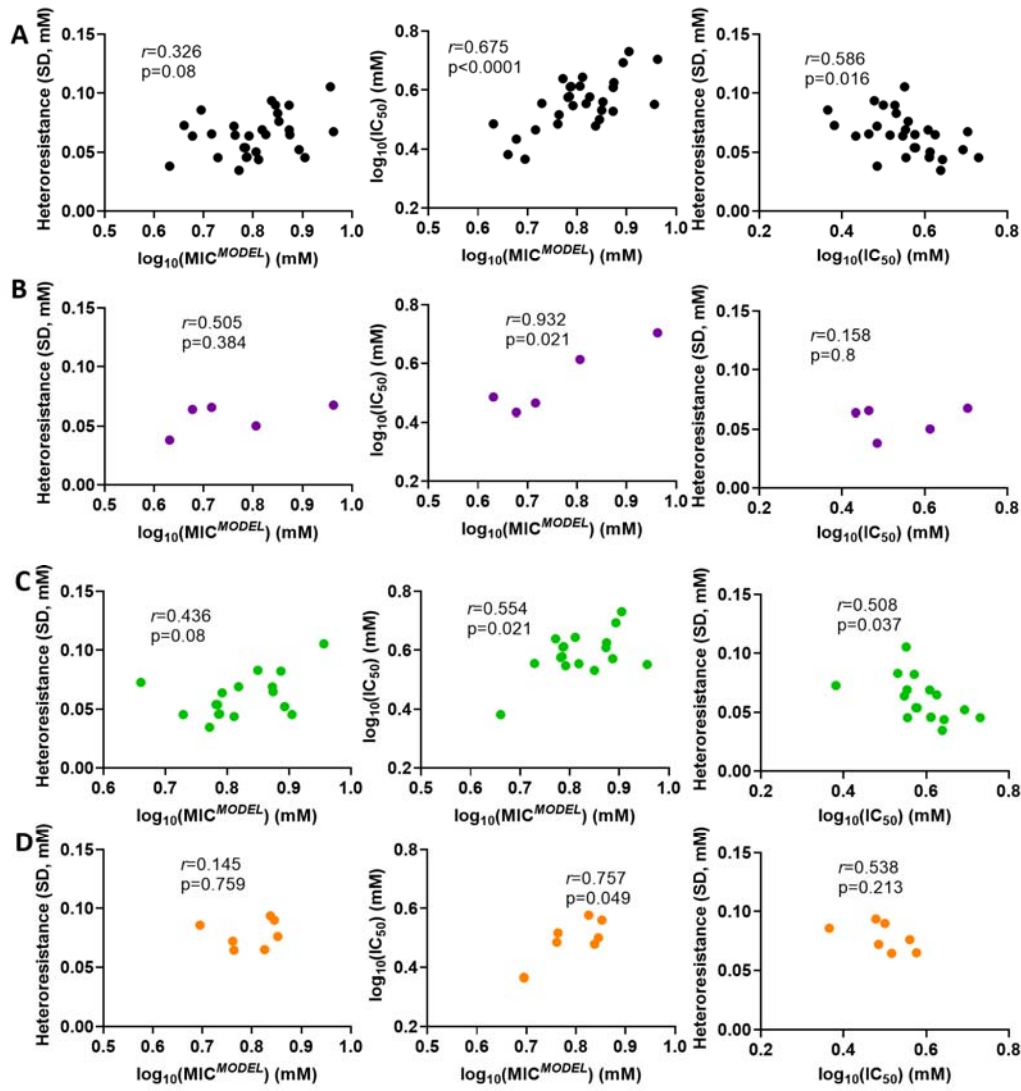

Figure 4: Relationships between heteroresistance,  $IC_{50}$  and  $MIC^{MODEL}$  in the main panel of *Zygosaccharomyces* sp. isolates. Data were obtained as described in Figure 3. (A) Cross-species panel of *Zygosaccharomyces* isolates (n=29) (Table 1). (B) *Z. bailii* only (n=5). (C) *Z. parabailii* only (n=17). (D) *Z. pseudobailii* only (n=7).

684

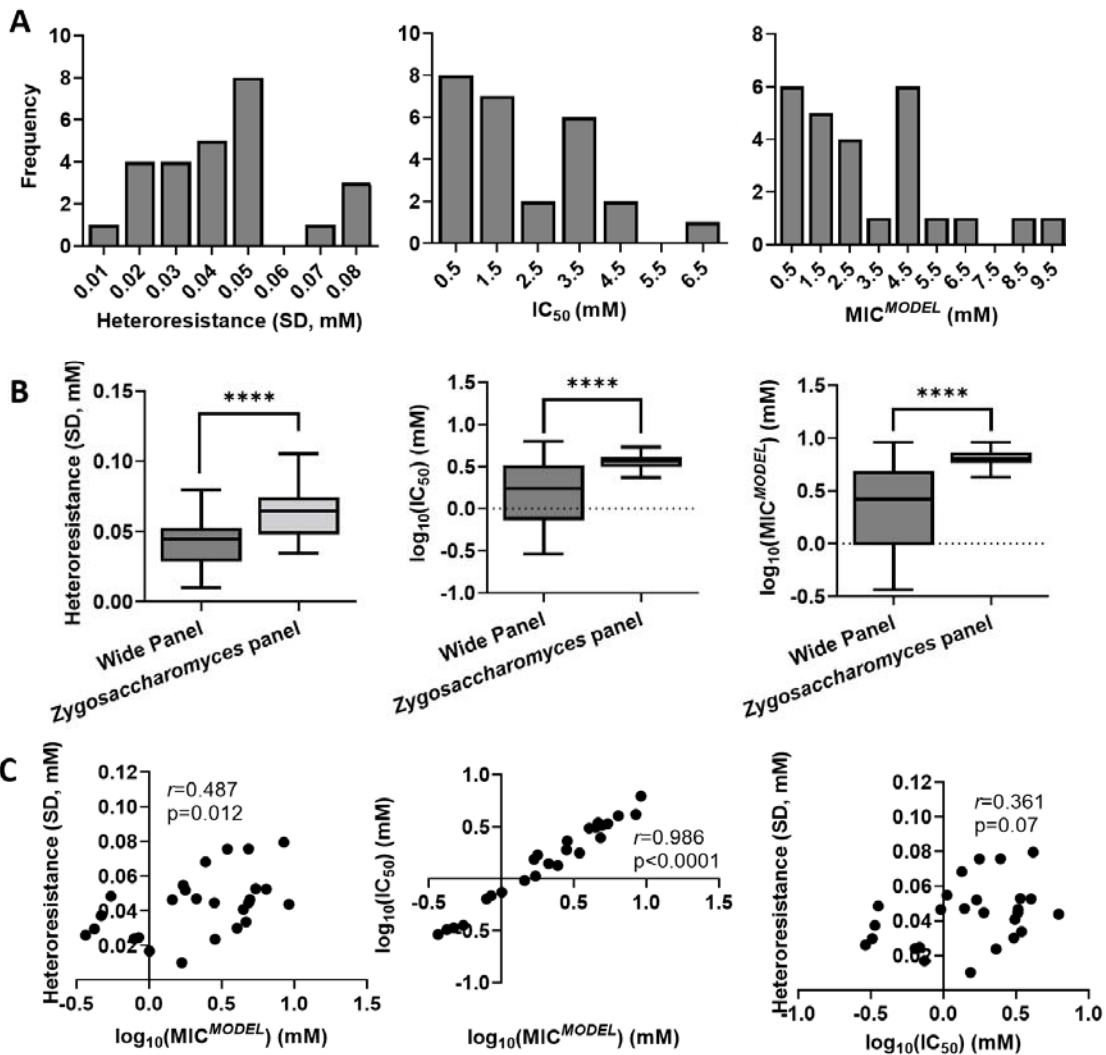

685

686

687

688 **Figure 5: Trends in sorbic acid heteroresistance, IC<sub>50</sub> and MIC<sup>MODEL</sup> in a wide panel of diverse yeast species.**

689 **(A)** Frequency histograms showing the spread of heteroresistance, IC<sub>50</sub> and MIC<sup>MODEL</sup> measured using the dose

690 response curve method. Values for individual 26 species are listed in Table S2. Values for individual isolates

691 were means from three biological replicates. **(B)** Box and whisker plots comparing the parameters between the

692 wide panel (n=26) and the *Zygosaccharomyces* panel (n=29) data from Figure 4. \*\*\*, p<0.0001 according to a

693 two-sample *t*-test assuming unequal variances. **(C)** Correlations between heteroresistance, IC<sub>50</sub> and MIC<sup>MODEL</sup>

694 for the wide panel.

695
